# Supplementary material for: Corn Cobs’ Biochar as Green Host of Salt Hydrates for Enhancing the Water Sorption Kinetics in Thermochemical Heat Storage Systems
Source: MDPI journal article supplement (doi:10.3390/molecules28145381), 2023-07-13
Supplement: s1 [file s1]

## Supplementary Materials

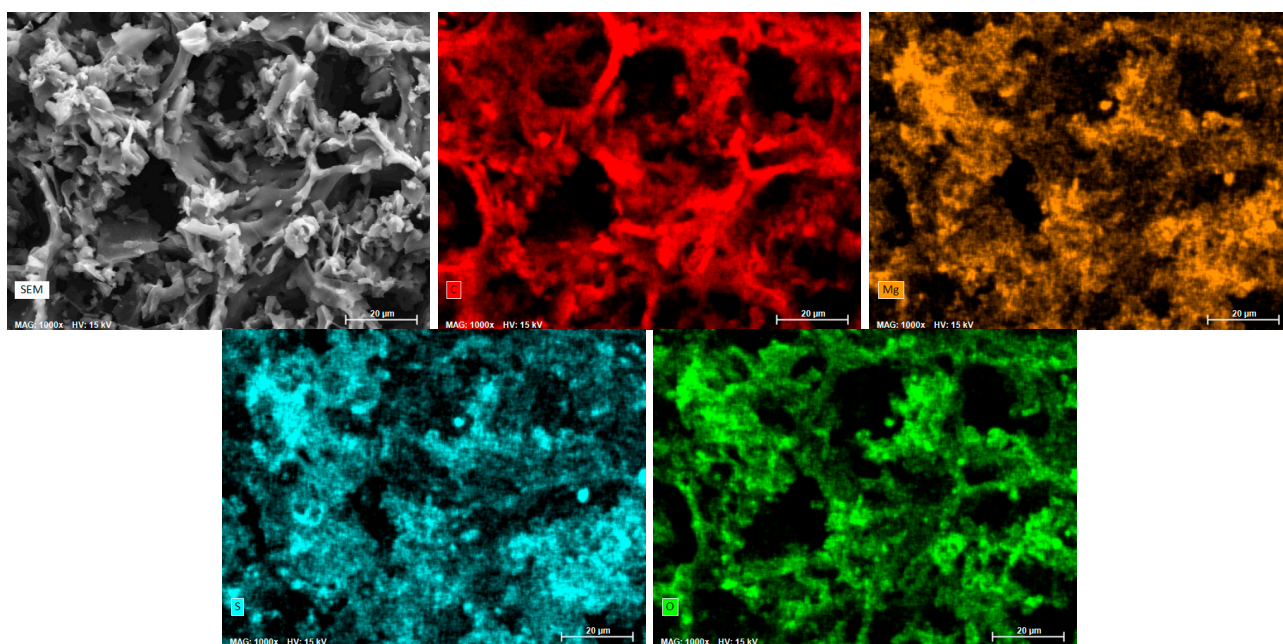

**Figure S1:** SEM images and EDX mappings of 5MgCC.

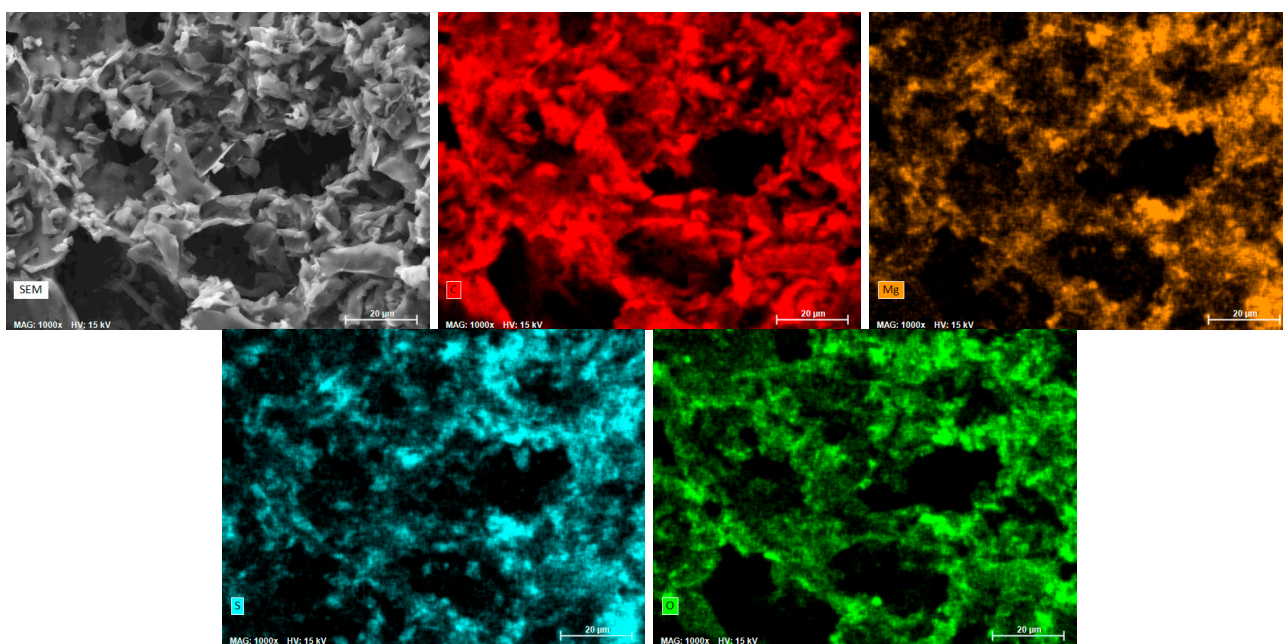

**Figure S2:** SEM images and EDX mappings of 10MgCC.

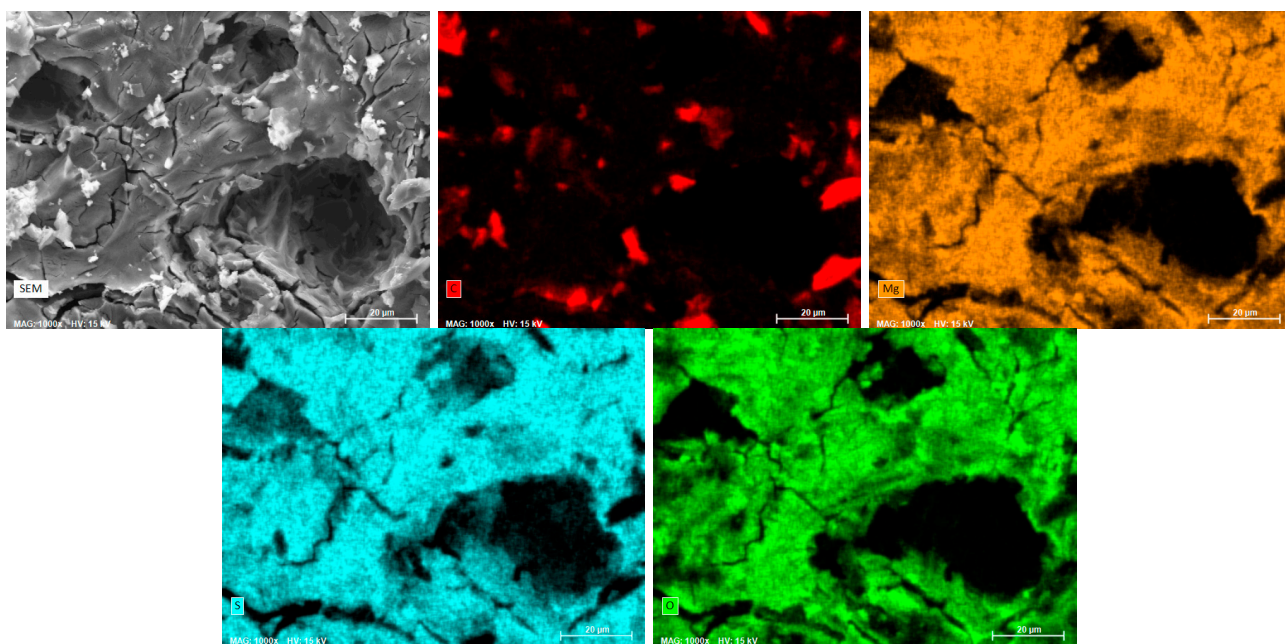

**Figure S3:** SEM images and EDX mappings of 15MgCC.

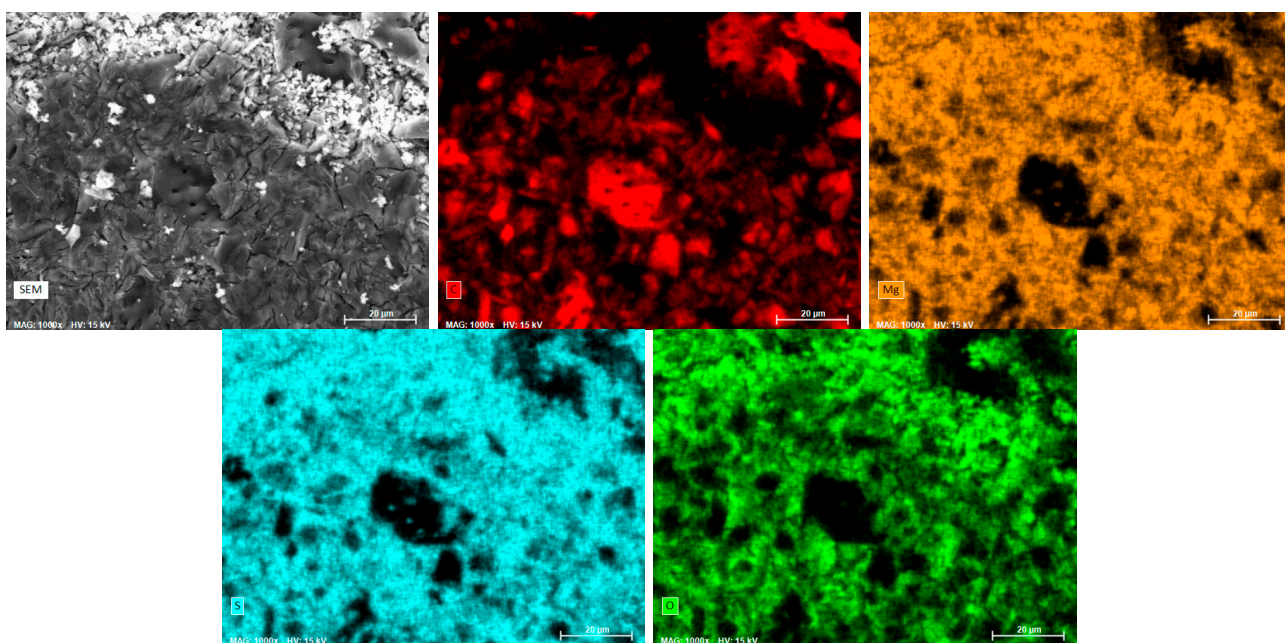

**Figure S4:** SEM images and EDX mappings of 20MgCC.
